# Supplementary material for: In Situ Study of Twin Boundary Stability in Nanotwinned Copper Pillars under Different Strain Rates
Source: MDPI journal article supplement (doi:10.3390/nano13010190), 2023-01-01
Supplement: s1 [file s1]

## Supplementary Videos

Video S1 *In-situ* TEM observation of nanoscopic deformation of nt-Cu nanopillar under compression at a relatively high strain rate of about  $3.1 \times 10^{-4}/\text{s}$  (10 times speed up).

Video S2 *In-situ* TEM observation of nanoscopic deformation of nt-Cu nanopillar under compression at a medium strain rate of about  $1.3 \times 10^{-4}/\text{s}$  (10 times speed up).

Videos S3-S6 *In-situ* TEM observation of nanoscopic deformation of nt-Cu nanopillars under compression at an ultralow strain rate of  $2.3 \times 10^{-5}/\text{s}$  (5 times speed up).
