# Supplementary material for: In Situ Study of Twin Boundary Stability in Nanotwinned Copper Pillars under Different Strain Rates
Source: Nanomaterials (Basel). 2023 Jan 1;13(1):190. doi: 10.3390/nano13010190 (PMC9823832; doi:10.3390/nano13010190)
Supplement: Supplementary file 1 [file nanomaterials-13-00190-s001.zip]

Archive with 5 entries (5 files):
- nanomaterials-2127530-supplementary-Figures.pdf
- nanomaterials-2127530-supplementary-Videos.pdf
- Video S1.wmv
- Video S2.wmv
- Video S3.wmv
